# Supplementary material
Source: PubMed Central journal article supplement (PMC11093673)
Supplement: ciad701_supplementary_data.pdf [file ciad701_supplementary_data.pdf]

# Differential Viral Dynamics by Sex and Body Mass Index During Acute SARS-CoV-2 Infection: Results from a Longitudinal Cohort Study

## Supplemental Tables and Figures

### Contents

|                                                                                                                               |   |
|-------------------------------------------------------------------------------------------------------------------------------|---|
| <b>Supplemental Tables and Figures</b> .....                                                                                  | 1 |
| Supplemental Figures.....                                                                                                     | 2 |
| Supplemental Figure 1: Distribution of Participant Body Mass Indices by Sex.....                                              | 2 |
| Supplemental Figure 2: Correlation of Covariates by Sex.....                                                                  | 2 |
| Supplemental Figure 3: Ct Values throughout SARS-CoV-2 Infection among Males and Females.....                                 | 3 |
| Supplemental Figure 4: Predicted ORF-1 a/b Ct values, Nadir Ct Values, and Strongly Detectable Infections by Sex and BMI..... | 4 |
| Supplemental Figure 5: Actual vs Predicted Ct Values for Model 1 by Sex and BMI.....                                          | 5 |
| Supplemental Tables.....                                                                                                      | 6 |
| Supplemental Table 1: Estimated Coefficients for Sex and BMI in Bivariate Models.....                                         | 6 |
| Supplemental Table 2: Estimated Coefficients for All Variables in Adjusted Models.....                                        | 6 |
| Supplemental Table 3: Estimated Coefficients for all Covariates in Adjusted Models with Interaction Terms.....                | 7 |

## Supplemental Figures

### Supplemental Figure 1: Distribution of Participant Body Mass Indices by Sex

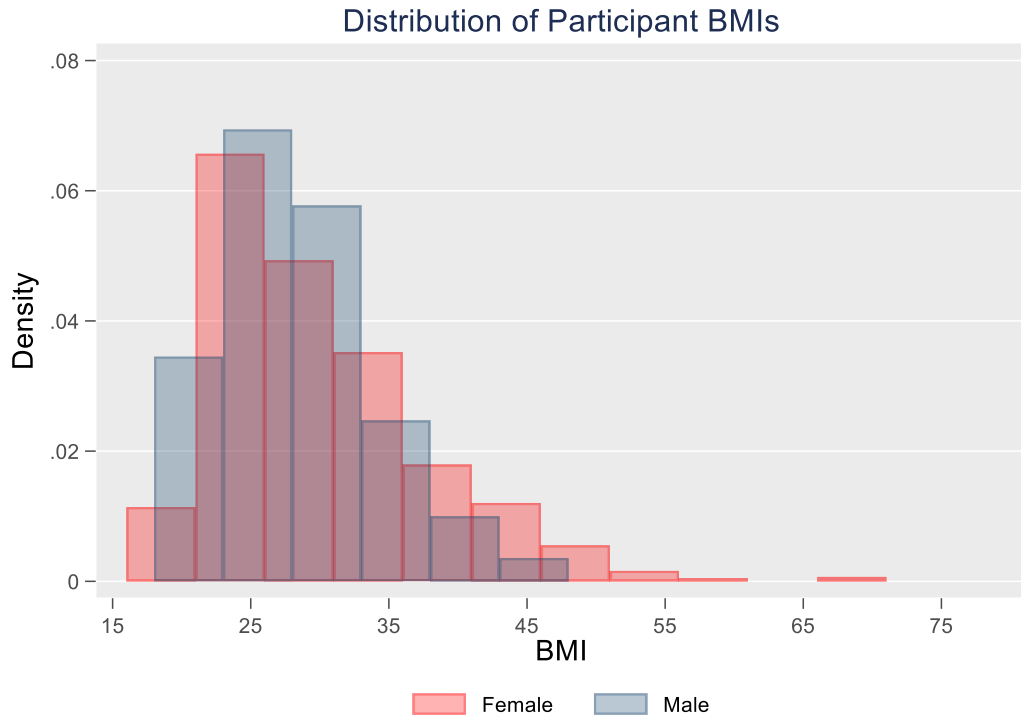

### Supplemental Figure 2: Correlation of Covariates by Sex

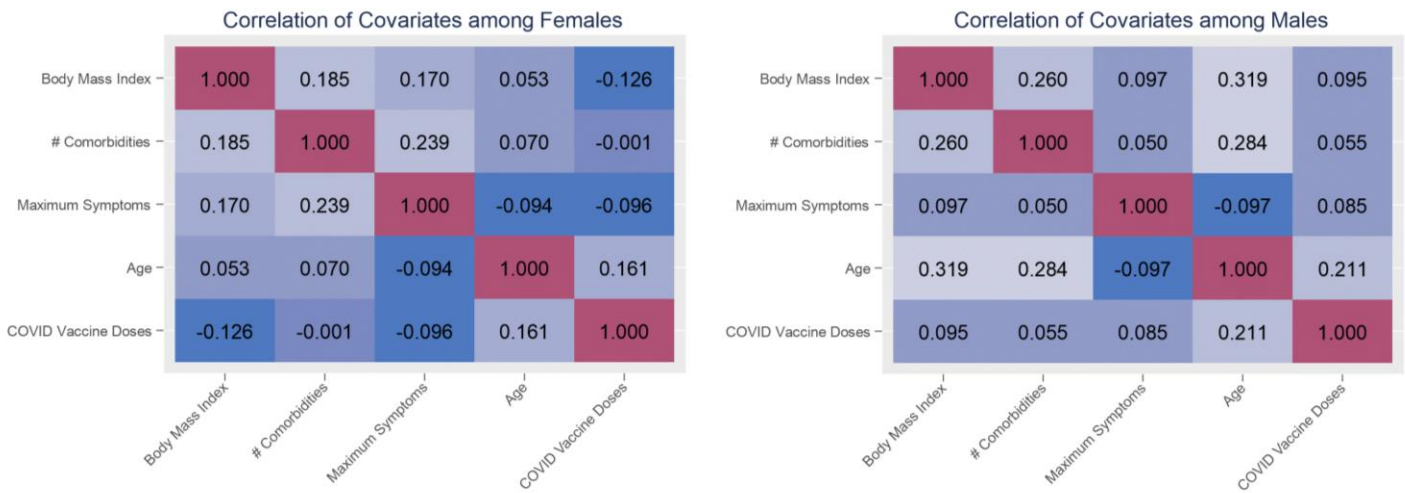

Supplemental Figure 3: Ct Values throughout SARS-CoV-2 Infection among Males and Females

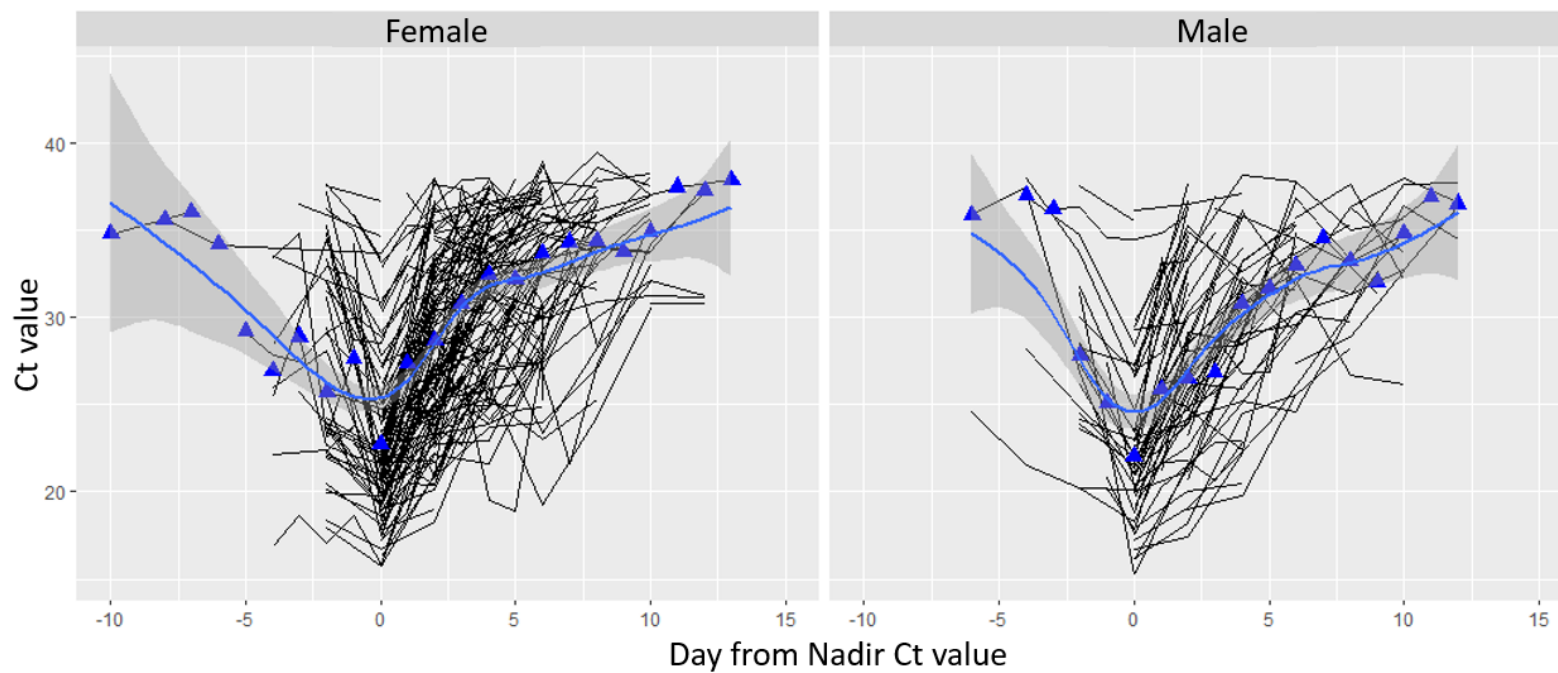

### Supplemental Figure 4: Predicted ORF-1 a/b Ct values, Nadir Ct Values, and Strongly Detectable Infections by Sex and BMI

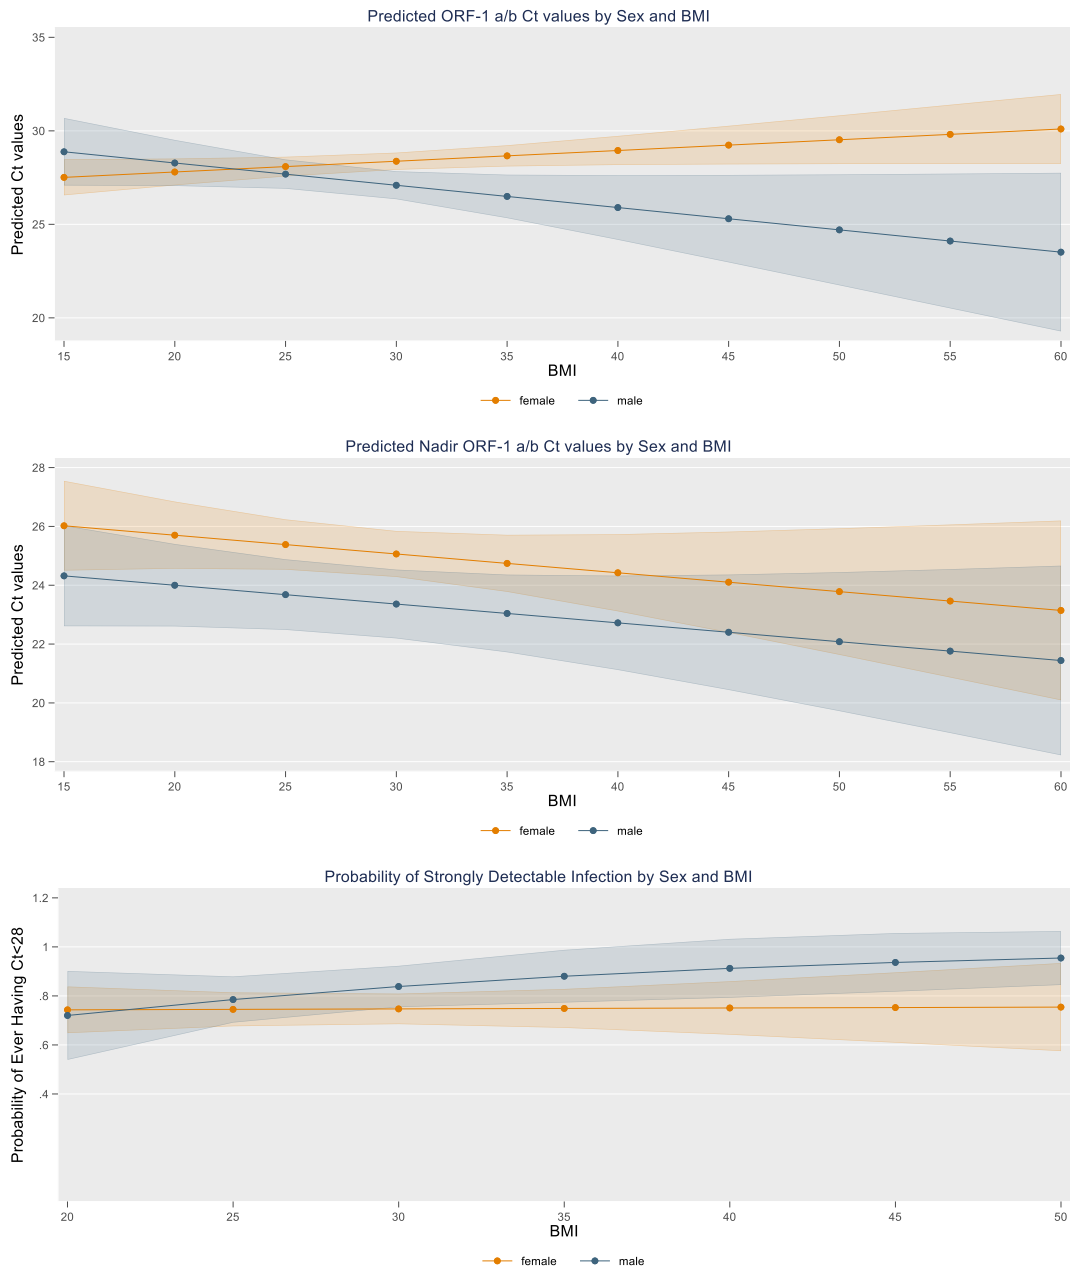

Males are shown in dark blue, and females are shown in orange. The shaded error bar represents the 95% confidence interval. Supplemental Figure 2a shows predicted cycle threshold (Ct) values for the ORF-1 a/b gene among males and females by body mass index (BMI). Figure 2b shows predicted nadir cycle threshold (Ct) values for the ORF-1 a/b gene among males and females by body mass index (BMI). Figure 2c shows probability of a strongly detected infection among males and females by body mass index (BMI). Strongly detected infection is defined as at least one ORF-1 a/b cycle threshold value below or equal to 28.

Supplemental Figure 5: Actual vs Predicted Ct Values for Model 1 by Sex and BMI

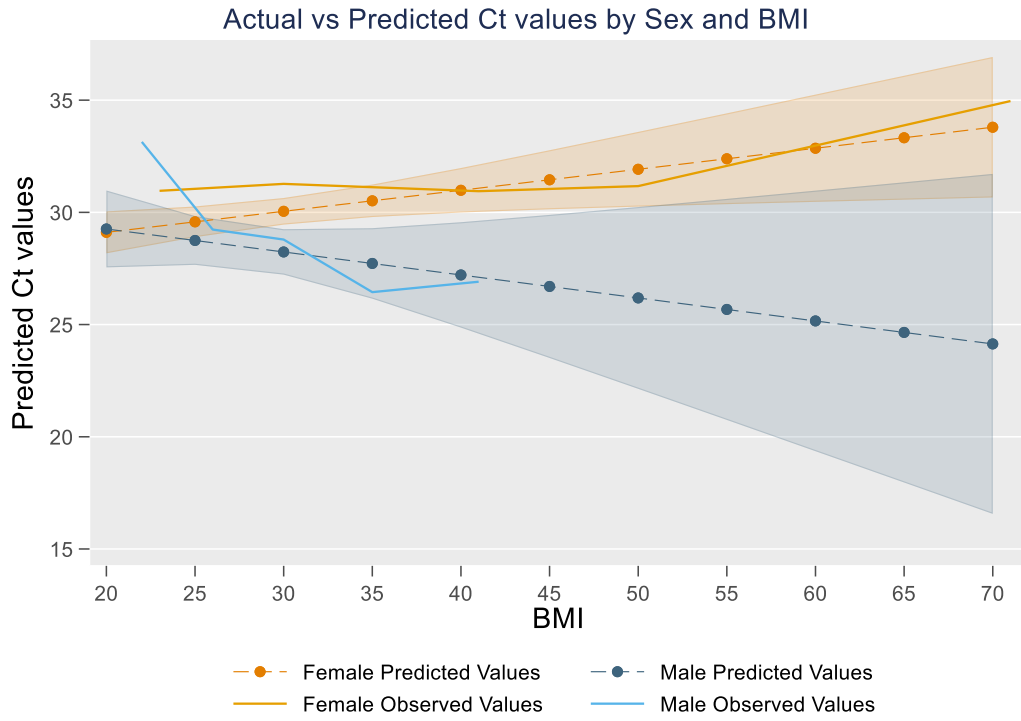

\*Observed values plotted as mean values

## Supplemental Tables

**Supplemental Table 1: Estimated Coefficients for Sex and BMI in Bivariate Models**

|          | Model 1: Ct Values by Sex and BMI |                         | Model 2: Nadir Ct Values by Sex and BMI |                         | Model 3: Odds of Highly Detectable Infection by Sex and BMI <sup>1</sup> |                         |
|----------|-----------------------------------|-------------------------|-----------------------------------------|-------------------------|--------------------------------------------------------------------------|-------------------------|
|          | Estimate                          | 95% Confidence Interval | Estimate                                | 95% Confidence Interval | Estimate                                                                 | 95% Confidence Interval |
| BMI      | -0.02                             | (-0.08 to 0.04)         | -0.12                                   | (-0.24 to -0.01)        | 1.02                                                                     | (0.99 to 1.05)          |
| Male Sex | -1.15                             | (-2.15 to -0.16)        | -1.86                                   | (-3.65 to -0.06)        | 1.72                                                                     | (1.05 to 2.81)          |

<sup>1</sup>Estimates from model 3 are exponentiated.

**Supplemental Table 2: Estimated Coefficients for All Variables in Adjusted Models**

|                                | Model 1: Ct Values by Sex and BMI <sup>2</sup> |                         | Model 2: Nadir Ct Values by Sex and BMI <sup>3</sup> |                         | Model 3: Odds of Highly Detectable Infection by Sex and BMI <sup>1,3</sup> |                         |
|--------------------------------|------------------------------------------------|-------------------------|------------------------------------------------------|-------------------------|----------------------------------------------------------------------------|-------------------------|
|                                | Estimate                                       | 95% Confidence Interval | Estimate                                             | 95% Confidence Interval | Estimate                                                                   | 95% Confidence Interval |
| <b>Fixed Effects:</b>          |                                                |                         |                                                      |                         |                                                                            |                         |
| Male sex                       | -1.49                                          | -2.5 to -0.49           | -2.65                                                | -4.2 to -1.05           | 2.39                                                                       | 1.3 to 4.4              |
| BMI                            | 0.04                                           | -0.02 to 0.10           | -0.04                                                | -0.14 to 0.07           | 1.00                                                                       | 0.96 to 1.04            |
| Symptoms                       | -1.10                                          | -1.3 to -0.91           | -1.98                                                | -2.4 to -1.6            | 2.17                                                                       | 1.8 to 2.7              |
| Age Category                   |                                                |                         |                                                      |                         |                                                                            |                         |
| 45-64 years                    | -0.75                                          | -1.8 to 0.34            | -0.32                                                | -2.0 to 1.4             | 0.82                                                                       | 0.42 to 1.6             |
| 65+ years                      | -1.14                                          | -3.3 to 1.0             | 0.58                                                 | -2.7 to 3.9             | 0.78                                                                       | 0.24 to 2.6             |
| Omicron variant                | 0.01                                           | -1.2 to 1.2             | -1.61                                                | -3.5 to 0.27            | 2.96                                                                       | 1.4 to 6.4              |
| Vaccinated                     | -0.38                                          | -1.4 to 0.66            | 1.90                                                 | 0.23 to 3.6             | 0.67                                                                       | 0.35 to 1.3             |
| (Days from Nadir) <sup>2</sup> | 0.08                                           | 0.07 to 0.09            | ---                                                  | ---                     |                                                                            |                         |
| Prior infection                | 0.96                                           | -0.59 to 2.5            | 1.09                                                 | -1.5 to 3.7             | 0.55                                                                       | 0.22 to 1.4             |
| Comorbidities                  |                                                |                         |                                                      |                         |                                                                            |                         |
| 1 comorbidity                  | -0.86                                          | -2.0 to 0.24            | -1.59                                                | -3.4 to 0.22            | 1.14                                                                       | 0.59 to 2.2             |
| 2+ comorbidities               | -0.38                                          | -1.8 to 1.0             | -1.84                                                | -4.2 to 0.54            | 2.30                                                                       | 0.87 to 6.1             |
| Constant                       | 30.84                                          | 28.5 to 33.1            | 31.94                                                | 28.2 to 35.7            | 0.21                                                                       | 0.05 to 0.93            |
| <b>Random effects</b>          |                                                |                         |                                                      |                         |                                                                            |                         |
| Study ID                       | 13.85                                          | 11.1 to 17.3            | ---                                                  | ---                     | ---                                                                        | ---                     |

<sup>1</sup>Estimates from model 3 are exponentiated.

<sup>2</sup>Model adjusted for sex, BMI, vaccination status, previous infections, number of symptoms, comorbidities, age, variant, and (day from nadir)<sup>2</sup>

<sup>3</sup>Model adjusted for sex, BMI, vaccination status, previous infections, number of symptoms, comorbidities, age, and variant.

**Supplemental Table 3: Estimated Coefficients for all Covariates in Adjusted Models with Interaction Terms**

|                                | Model 1: Ct Values by Sex and BMI <sup>2</sup> |                         | Model 2: Nadir Ct Values by Sex and BMI <sup>3</sup> |                         | Model 3: Odds of Highly Detectable Infection by Sex and BMI <sup>1,3</sup> |                         |
|--------------------------------|------------------------------------------------|-------------------------|------------------------------------------------------|-------------------------|----------------------------------------------------------------------------|-------------------------|
|                                | Estimate                                       | 95% Confidence Interval | Estimate                                             | 95% Confidence Interval | Estimate                                                                   | 95% Confidence Interval |
| <b>Fixed Effects:</b>          |                                                |                         |                                                      |                         |                                                                            |                         |
| Male sex                       | 3.45                                           | -1.4 to 8.3             | 1.45                                                 | -6.2 to 9.1             | 0.34                                                                       | 0.02 to 7.2             |
| BMI                            | 0.07                                           | 0.00 to 0.14            | -0.01                                                | -0.13 to 0.11           | 0.98                                                                       | 0.94 to 1.0             |
| Sex*BMI                        | -0.18                                          | -0.35 to -0.01          | -0.15                                                | -0.41 to 0.12           | 1.07                                                                       | 0.96 to 1.2             |
| Symptoms                       | -1.11                                          | -1.3 to -0.92           | -1.99                                                | -2.4 to -1.6            | 2.20                                                                       | 1.8 to 2.7              |
| Age Category                   |                                                |                         |                                                      |                         |                                                                            |                         |
| 45-64 years                    | -0.73                                          | -1.8 to 0.36            | -0.27                                                | -2.0 to 1.4             | 0.81                                                                       | 0.42 to 1.6             |
| 65+ years                      | -0.89                                          | -3.1 to 1.3             | 0.74                                                 | -2.6 to 4.0             | 0.75                                                                       | 0.22 to 2.5             |
| Omicron variant                | 0.09                                           | -1.1 to 1.3             | -1.56                                                | -3.4 to 0.32            | 2.86                                                                       | 1.3 to 6.2              |
| Vaccinated                     | -0.29                                          | -1.3 to 0.74            | 1.95                                                 | 0.28 to 3.6             | 0.64                                                                       | 0.33 to 1.2             |
| (Days from Nadir) <sup>2</sup> | 0.08                                           | 0.07 to 0.09            |                                                      |                         |                                                                            |                         |
| Prior infection                | 0.85                                           | -0.7 to 2.4             | 0.94                                                 | -1.7 to 3.6             | 0.59                                                                       | 0.23 to 1.5             |
| Comorbidities                  |                                                |                         |                                                      |                         |                                                                            |                         |
| 1                              | -0.83                                          | -1.9 to 0.27            | -1.57                                                | -3.4 to 0.23            | 1.11                                                                       | 0.56 to 2.2             |
| 2+                             | -0.32                                          | -1.7 to 1.07            | -1.69                                                | -4.1 to 0.70            | 2.07                                                                       | 0.77 to 5.5             |
| Constant                       | 29.87                                          | 27.4 to 32.33           | 31.05                                                | 27.0 to 35.1            | 0.32                                                                       | 0.06 to 1.7             |
| <b>Random effects</b>          |                                                |                         |                                                      |                         |                                                                            |                         |
| Study ID                       | 13.64                                          | 10.9 to 17.1            | ---                                                  | ---                     | ---                                                                        | ---                     |

<sup>1</sup>Estimates from model 3 are exponentiated.

<sup>2</sup>Model adjusted for sex, BMI, vaccination status, previous infections, number of symptoms, comorbidities, age, variant, and (day from nadir)<sup>2</sup>

<sup>3</sup>Model adjusted for sex, BMI, vaccination status, previous infections, number of symptoms, comorbidities, age, and variant.
